# EXPRESSION OF CONCERN

## Correction: Correction: Who Lives Where and Does It Matter? Changes in the Health Profiles of Older People Living in Long Term Care and the Community over Two Decades in a High Income Country

The *PLOS ONE* Staff

The name of the author group is incorrect. The correct author group is Cognitive Function and Ageing Studies (CFAS) collaboration. The publisher apologizes for the error.

### References

1. Matthews FE, Bennett H, Wittenberg R, Jagger C, Denning T, Brayne C, et al. (2016) Who Lives Where and Does It Matter? Changes in the Health Profiles of Older People Living in Long Term Care and the Community over Two Decades in a High Income Country. *PLoS ONE* 11(9): e0161705. <https://doi.org/10.1371/journal.pone.0161705> PMID: 27589586
2. The PLOS ONE staff (2016) Correction: Who Lives Where and Does It Matter? Changes in the Health Profiles of Older People Living in Long Term Care and the Community over Two Decades in a High Income Country. *PLoS ONE* 11(10): e0164935. <https://doi.org/10.1371/journal.pone.0164935> PMID: 27732662

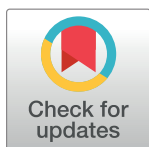

### OPEN ACCESS

**Citation:** The *PLOS ONE* Staff (2017) Correction: Correction: Who Lives Where and Does It Matter? Changes in the Health Profiles of Older People Living in Long Term Care and the Community over Two Decades in a High Income Country. *PLoS ONE* 12(3): e0174193. <https://doi.org/10.1371/journal.pone.0174193>

**Published:** March 14, 2017

**Copyright:** © 2017 The PLOS ONE Staff. This is an open access article distributed under the terms of the [Creative Commons Attribution License](https://creativecommons.org/licenses/by/4.0/), which permits unrestricted use, distribution, and reproduction in any medium, provided the original author and source are credited.
